# Supplementary material for: Performance-guaranteed distributed control for multiple plant protection UAVs with collision avoidance and a directed topology
Source: Front Plant Sci. 2022 Sep 21;13:949857. doi: 10.3389/fpls.2022.949857 (PMC9534514; doi:10.3389/fpls.2022.949857)
Supplement: Supplementary file 1 [file Data_Sheet_1.docx]

# Appendix

**Proof of Theorem 1:** Consider the following Lyapunov function

where with , , , , and is a constant satisfying with . Denote , and , . Then, the following equation can be obtained

Through and , by denoting , the time derivative of is

It should be noticed that , , , , . Combing these above inequality, becomes

where , . It is easily verified that and . Besides, the same deduction applies to and . Therefore, it follows from that and hence , , , . From the boundedness of and , it is deduced the boundedness of , , , , and . The proof is completed.
